# Supplementary material
Source: ML conference proceedings conference paper supplement (https://openreview.net/forum?id=XC_yGI-0j9)
Supplement: supplementary_material [file attachment]

# SUPPLEMENTARY MATERIAL FOR: EFFICIENT APPROXIMATION OF NEURAL POPULATION STRUCTURE AND CORRELATIONS WITH PROBABILISTIC CIRCUITS

**Koosha Khalvati**

Allen Institute, Seattle, WA 98109  
koosha.khalvati@alleninstitute.org

**Samantha N. Johnson**

University of Chicago, Chicago, IL 60637  
snjohnso@uchicago.edu

**Stefan Mihalas**

Allen Institute, Seattle, WA 98109  
stefanm@alleninstitute.org

**Michael A. Buice**

Allen Institute, Seattle, WA 98109  
michaelbu@alleninstitute.org

In the EIF network, each neuron’s membrane voltage,  $V_i (1 \leq i \leq N)$  evolves as follows:

$$\begin{aligned}\tau_m V_i' &= -V_i + \Delta_T e^{\frac{V_i - V_S}{\Delta_T}} + I_i(t), \\ I_i(t) &= \gamma + \sqrt{\sigma^2 \tau_m} [\sqrt{1 - \lambda} \xi_i(t) + \sqrt{\lambda} \xi_c(t)].\end{aligned}\tag{1}$$

When the membrane voltage  $V_i$  reaches the soft threshold  $V_S = -53$  mV, it starts to diverge rapidly until it hits the hard threshold of  $V_H = 20$  mV. At that point, the neuron spikes and the membrane voltage resets to  $V_R = -60$  mV. The voltage stays at  $V_R$  for the refractory period of 3 ms. The input current  $I_i(t)$  has a DC level of  $\gamma = -60$  mV, and a white noise term with amplitude of  $\sigma = 6.23$  mV. The white noise consists of a common input for all neurons,  $\xi_c(t)$  and also an independent one,  $\xi_i(t)$  for neuron  $i$ . Parameter  $\lambda$  controls the correlation between neurons by changing the weights of these two inputs. Other parameters are membrane time constant  $\tau_m = 5$  ms, and  $\Delta_T = 3$  mV which gives the spike initiation slope. We simulated this network with the backward Euler method, using time bins of 1 ms.

To simulate a heterogeneous network, we used various voltage membrane voltage  $V_R$  (to change firing rate) and correlation parameter  $\lambda$  (to change dependency/correlation with other neurons) for different subsets of the population. Specifically, neurons were divided into 4 groups with  $V_R = [-58, -59, -60, -61]$  mV and  $\lambda = [.25, .30, .45, .59]$ , respectively. Neuron  $i$  and  $j$  had the same parameter if and only if  $i = j \pmod{4}$ . Moreover, when  $\lambda_2 > 0$ , we paired neurons with  $V_R = -58$  mV with neurons with  $V_R = -59$  mV, and neurons with  $V_R = -60$  mV with neurons with  $V_R = -61$  mV.

For simulating networks with heterogeneous connectivity we used the well-known connected “balanced” network of excitatory and inhibitory spiking neurons from Brunel (2000). This network is composed of  $N_E = 10000$  excitatory neurons and  $N_I = 2500$  inhibitory neurons. The dynamics of the membrane voltage of each neuron is governed by:

$$\tau_m V_i' = -V_i + RI_i(t), \quad RI_i(t) = \tau_m \sum_j J_{ij} \sum_k \delta(t - t_j^k - D),\tag{2}$$

where  $I_i(t)$  are the synaptic currents caused by spikes arriving at synapses of neuron  $i$  and  $R$  is the membrane resistance.  $\tau_m = 20$ ms and the synaptic delay  $D = 1.5$ ms.  $J_{ij}$  gives the PSP amplitudes for each synapse. Excitatory synapses have  $J_{ij} = J = 0.1$ mV and inhibitory synapses have  $J_{ij} = -gJ$ , where  $J = 0.1$ mV. Each neuron has synapses from a randomly chosen fraction  $\epsilon = 0.1$  of neurons from the excitatory and inhibitory populations. External synapses are driven by a Poisson process with a given rate  $\nu_{ext}$ . When the membrane potential reaches a given threshold  $\theta = 20$ mV, it is reset to a refractory potential  $V_r = 10$ mV and the neuron enters a refractory period of fixed duration  $\tau_{rp} = 2$ ms during which it ignores incoming stimulation. We specifically fit the models to two stable setups (figure 8, c and d) of the original paper with “stationary” and “slow oscillation” global activity Brunel (2000). These configurations correspond to  $g = 5, \nu_{ext} = 20$ Hz and  $g = 4.5, \nu_{ext} = 9$ Hz, respectively.

We used the Bernoulli RBM implementation of scikit-learn library (Pedregosa et al., 2011) with the default learning rate of .1.

## REFERENCES

- Nicolas Brunel. Dynamics of Sparsely Connected Networks of Excitatory and Inhibitory Spiking Neurons. *Journal of Computational Neuroscience*, 8(3):183–208, May 2000. ISSN 1573-6873. doi: 10.1023/A:1008925309027. URL <https://doi.org/10.1023/A:1008925309027>.
- F. Pedregosa, G. Varoquaux, A. Gramfort, V. Michel, B. Thirion, O. Grisel, M. Blondel, P. Prettenhofer, R. Weiss, V. Dubourg, J. Vanderplas, A. Passos, D. Cournapeau, M. Brucher, M. Perrot, and E. Duchesnay. Scikit-learn: Machine Learning in Python. *Journal of Machine Learning Research*, 12:2825–2830, 2011.
